# Supplementary material for: Staufen1 Regulates Multiple Alternative Splicing Events either Positively or Negatively in DM1 Indicating Its Role as a Disease Modifier
Source: PubMed Central journal article supplement (PMC4733145; doi:10.1371/journal.pgen.1005827), 2016-01-29
Supplement: pgen.1005827.s006.pdf [file pgen.1005827.s006.pdf]

**S2 Table. Validation Genes and Disease**

| <b>Gene symbol</b>             | <b>Gene name</b>                             | <b>ASE</b> | <b>Stau1 OE WT</b> | <b>Stau1 OE DM1</b> | <b>Predicted by screen</b> | <b>Variant previously reported</b> | <b>Reported variant name (<math>\Delta</math>exon)</b> | <b>Splice variant disease related?</b>                                                                     |
|--------------------------------|----------------------------------------------|------------|--------------------|---------------------|----------------------------|------------------------------------|--------------------------------------------------------|------------------------------------------------------------------------------------------------------------|
| <i>INSR</i>                    | Insulin Receptor                             | Exon 11    | Inclusion          | Inclusion           | Y                          | Y - Savkur et al., 2001            | IR-A                                                   | Y – DM1 - Savkur et al., 2001                                                                              |
| <i>hnRNP A2B1</i>              | Heterogeneous nuclear ribonucleoprotein A2B1 | Exon 2     | Skipping           | Skipping            | Y                          | Y – Koz et al., 1995               | hnRNP B1                                               | Y – Lung cancer - Sueoka et al., 1999; Kamma et al., 1999                                                  |
| <i>LRRC23</i>                  | Leucine-rich repeat-containing protein 23    | Exon 3     | Inclusion          | Inclusion           | Y                          | N                                  | -                                                      | N                                                                                                          |
| <i>NRG1</i>                    | Neuregulin 1                                 | Exon 8     | Skipping           | Skipping            | Y                          | ?                                  | ?                                                      | ? – NRG1 dysregulation disrupts synaptic plasticity - Agarwal et al., 2014                                 |
| <i>HIF1<math>\alpha</math></i> | Hypoxia-inducible factor 1-alpha             | Exon 14    | Inclusion          | Inclusion           | Y                          | Y - Gothie et al., 2000            | HIF1 $\alpha$ <sup>736</sup> and sHIF1 $\alpha$        | Y- higher expression levels of HIF1 $\alpha$ <sup>736</sup> in OR-negative carcinomas - Dales et al., 2010 |
| <i>FNI</i>                     | Fibronectin                                  | Exon 33    | Skipping           | Skipping            | Y                          | Y - Goossens et al., 2009          | EDA or EDI                                             | Y – DM1 - Ohsawa et al., 2011                                                                              |
| <i>ACCN3</i>                   | acid sensing (proton gated) ion channel 3    | Exon 6     | --                 | Inclusion           | Y                          | ?                                  | ?                                                      | N                                                                                                          |
| <i>CLCN6</i>                   | Chloride Channel, Voltage-Sensitive 6        | Exon 4     | Inclusion          | Skipping            | Y                          | Y – Eggermont et al., 1997         | CIC6b and Exon y+3                                     | N                                                                                                          |

Y- Yes; N- No; ? - Variant reported in databases (NCBI) however could not find variant in publication; - - No information
