# Supplementary material for: Staufen1 Regulates Multiple Alternative Splicing Events either Positively or Negatively in DM1 Indicating Its Role as a Disease Modifier
Source: PLoS Genet. 2016 Jan 29;12(1):e1005827. doi: 10.1371/journal.pgen.1005827 (PMC4733145; doi:10.1371/journal.pgen.1005827)
Supplement: S1 Table — This excel file contains: Tab 1: The raw data PSI values from all four conditions performed in this study, Tab 2: The ASEs PSI values from DM1 conditions compared to CTRL from Klinck et al., 2014, Tab 3: The comparison between ASEs in DM1 between Klinck et al., 2014 and the splicing screen from the current study, Tabs 5 and 6: Comparison between ASEs regulated by Stau1 to MBNL1 and/or RBFOX1. All PSI≥5% were considered for any analysis comparing our data with that our Klinck et al., 2014., Tab 6: The subfamilies of Alu elements in Stau1-regulated targets. (XLSX) [file pgen.1005827.s005.xlsx]

## Sheet: Our Screen - Raw
	Percent Splicing Index (PSI) values
Gene	DM1+GFP	DM1+Stau1-HA	WT+GFP	WT+Stau1-HA
ABCB8	0.756608	0.733393	0.816361	0.80389		PSI = upper isoform/(upper isoform+lower isoform)
ABCC4	0.627803	0.592417	0.313333	0.423781
ACCN3	0.358974	0.802548		0		Primers available upon request
ACHE	0.80597	0.114943
ACTN1a	0.118182	0.0633641	0.00703083	0.00745871
ACTN1b	0.845686	0.864471	0.733435	0.798425
ADORA2A			0.106061	0
ADPGKa	0.944118	0.899329	0.917647	0.849421
ADPGKb	0.480392	0.464692	0.35	0.418251
AFG3L2	1	1	0.790191	0.759883
AIMP2	0.92922	0.930362	0.902715	0.873016
AKR1A1a	0.837423	0.565217	0.47875	0.594363
AKR1A1b	0.950538	0.93692	1	1
AKR1A1c	0.0996785	0.135678	0.151079	0.130275
AKT2	0.808342	0.825994	0.798479	0.817116
ANK2a	0	0	0	0
ANK2b
ANK2c	0	0.00838169	0.0175055	0.00555556
ANK2d	0.137978	0.280856	0.351598	0.473563
ANK2e	0.284803	0.382594	0.268562	0.48731
ANKRD23	0.538168	0.89644	0.421488	0.608696
ANKRD39	0.0843373	0.0909091	0.0168776	0.028
ANKRD39andANKRD23	0.958225	0.76	0.899254	0.8
ANO1
ANO10a	0.889344	0.894118	0.812883	0.860947
ANO10b	0.0506667	0.122951	0.248276	0.147208
ANO4a	0.278146	0.239374	0.253353	0.261111
ANO4b	0.965147	0.979189	0.973837	0.967514
ANO4c	0.0315534	0.0183486	0.012069	0
ANO5d
ANO9	0.620469	0.6891	0.80402	0.826367
ANXA6	0.76504	0.776995	0.752914	0.734694
AP1G2a	0.472826	0.700348	0.142857	0.252788
AP1G2b	0.0907534	0.0403587	0.0514851	0.0352734
APC	0.967782	0.952036	0.910864	0.91791
APC	0.747573	0.744898
APOL1	0.0970874	0
ARF1	0.228346	0.3	0.183908	0.307471
ARHGEF11	0.189873	0.230461	0.24878	0.236534
ARHGEF25	0.945386	0.958669	0.0240964	0
ARHGEF25	0.813415	0.880035	0.504464	0.578571
ARNT	0	0.0236337
ASIC3	0.222222	0.348039	0.181818	0.110656
ASPH	0.123967	0	0.211679	0.0714286
ATG5	0.904675	0.891753	0.962555	0.924122
ATP2A1
ATP2A1	0.843373
BEST1	0.275304	0.2	0.26226	0.297222
BEST3
BEST3
BEST3
BEST3			0.563636
BIN1
BIN1	0.0109489	0.00834202	0.0407978	0.0347163
BMP4		0.8
BOC	0.0141767	0.0151878	0.0104478	0.0162003
BTG1	0.197531	0
BTG1	0.496855	1
C10orf58	0.773256	0.752784	0.807229	0.646789
C10orf58
C19orf51		0.170455
C8orf38	0.124046	0.200627	0.199105	0.211302
CACNA1B		0.863309	0.211765	0.415254
CACNA1C	0.08742	0.0666667	0.0307487	0.0376135
CACNA1C	0.78125	1	0.760417	1
CACNA1C	0.25	0.153846	0.154412	0.273438
CACNA1C	0.0863132	0.0767327	0.0684411	0.0604839
CACNA1D
CACNA1E
CACNA1E	1	1	0.977778	1
CACNA1G	1	1
CACNA1H
CACNA2D2
CACNA2D3	0	0	0	0
CACNA2D4
CACNA2D4
CACNA2D4
CACNB4	0.634921	0.596154	0.599303	0.447205
CALCRL	0.649502	0.744838	0.479339
CALD1	0.772135	0.764801	0.656224	0.637344
CALM1	0	0.973518	0.0203562	0
CAMK2G	0.256065	0.316505	0.187117	0.201717
CAMK2G	0.00877193	0.165937	0	0
CAPN3	0.65625	0.738255	0.606061	0.741497
CAPN3	0.126582	0.111628	0.206751	0.154639
CAPN3
CAST	1	1	0.532148	0.53913
CAST		1	0.371242	0.366961
CAST			0.111722	0.119601
CATSPER3	0.225352	0	0	0.290909
CCDC19	0.183099	0.156863	0.0756303	0.138365
CDH13	0.11	0.155022	0	0
CDK5	0.888128	0.915864	0.831633	0.825024
CHKB	0.871134	0.85	0.742991	0.742424
CHODL	0.295918
CHRNA1	0.0700219	0.0774194	0.294118
CHRNA5	0.478947	0.323887
CHRNB1	0.447988	0.430506	0.818182
CHRND
CHRND		0.777778
CHRNE		0.864865
CHRNG	0.816901	0.904348
CLCC1	0.874263	0.896605	0	0
CLCC1	0.243007	0.24154	0.305936	0.324324
CLCC1			1	1
CLCN2	0.11661	0.100426	0.236776	0.207776
CLCN2	0.972746	0.843066	0.791762	0.964286
CLCN6	0.458564	0.226415		0.328767
CLCN6	0.797872	1
CLCN6	0.923474	0.921381	0.906015	0.941634
CLCN6	0.340042	0.307045	0.284223	0.315055
CLCNKA	1	1
CLIC5
CNGA3	0.209738	0.159664	0.188119	0.0730159
COL4A3BP	0.130293	0.113281	0.0616438	0.0395257
COL4A3BP	0.200908	0.188275	0.24553	0.237037
CPS1	0.198294	0.0962567	0.192308	0.0971564
CPT1B	0.961983	1	0.956098	0.877551
CPT1B	0.372549	0.340122	0.222798	0.258929
CREM	0.0610329	0.212766	0.104167	0.270968
CREM	1	1	1	1
CREM	0.280992	0.284884	0.192308	0.526316
CREM	0.14486	0.157635	0.31068	0.208511
CREM	0.692922	0.685039	0.573512	0.616352
CREM	0.127273	0.0917722	0.203647	0.076087
CSDA	0.31806	0.299363	0.239713	0.246839
DHTKD1	0.878519	0.912298	0.932409	0.873194
DHTKD1	0.933735	0.950368	0.947452	0.962264
DMD	0.127273	0.177243	0.284065	0.31681
DMD	0.700717	0.654886	0.567063	0.669231
DMWD	0.153722	0.175172	0.113464	0.112633
DNAAF3	0.149123		0	0
DNER	0.886686	0.953096	0.875	1
DNM1L	1	1	0.16835	0.0773639
DNM1L	0.508555	0.421402	0.364593	0.392755
DNM1L	0.289813	0.244136	0.203988	0.161206
DTNA	0.896254	0.748366	0.805556	0.3
DTNA
DUSP12	0.27729	0	0.391874	0.346198
DVL1	0.633452	0.636454	0.50419	0.448326
DYRK2	0.108989	0.0398724	0.34715	0.491409
DYSF	0.0767263	0.042841	0.0653358	0.0497018
DYSF	0.318807	0.322704	0.273931	0.303838
EDN3
EDN3
EDNRA	0.949946	0.973795	0.956731	0.855978
EIF4E2	0.303797	0.282171	0.368873	0.405988
ENO1	1	1	1	0.939394
ENO3	0.965228	1	0.93531	1
ENO3	0.434043	0.265766	0.197318	0.0386473
ENSA	0.746032	0.57265	0.772727	0.730159
EP300	0.921637	0.921026	0.869809	0.891613
EPM2A	0.79633	0.820477	0.763636	0.761468
EPM2A	0	0
EVC	0.444744	0.488095	0.378981	0.445104
FAM47E	0.28
FAM65B		1	1
FHL3	0	1	0.0522088	0.0486258
FKBP1B	0.116022	0.117188	0.183381	0.188953
FKTN	0.360656	0.796681	0.423377	0.396825
FLNB	0.905226	0.91876	0.89056	0.921227
FLNC	0.826022	0.937032	0.859695	0.934929
FN1	0.418402	0.329609	0.20935	0.16353
FXR1	0.0555556	0.0711497	0.0365923	0.0599748
FXR1	0.286979	0.32302	0.324693	0.342391
FXYD6	0.0749186	0.110742	0.0595855	0.0958165
G6PC3	0.872681	0.797146	0.515778	0.491508
G6PC3	0.323308	0.366534	0.280702	0.621849
GABRA2
GABRA2	1	1	1	1
GABRB2	1	0.966912
GABRE	0.571429	0.71134	0.694215	0.6875
GABRG2	0.7	0.870588
GANC	0.430843	0.378505	0.426259	0.300395
GANC	0.218247	0.200581	0.165103	0.0725953
GAR1	0.34153	0.394659	0.184783	0.241627
GGPS1andTBCEandRPS21P1	0.336957	0.307692	0.282051	0.252874
GLRA3
GLRB	0.599284	0.43254	0.402151	0.332661
GLYR1	0.63136	0.640671	0.629854	0.629469
GPD1	1	1
GRIA2	0.110329	0.0703971	0	0
GRIA2
GRIA2
GRIA3	0.0700132	0.0134933	0.139498	0.0947177
GRIA3		0.126214	0
GRID1	0.61875	0.713755
GRIK4
GUCY1A3
GUCY1A3
HCN3	0.921296	0.954098	0.860377	0.860465
HDAC10	0.796053	0.813808	0.914405	0.943249
HDAC3	0.852963	0.875895	0.904665	0.91109
HDAC9	0.685829	0.688312	0.631799	0.402655
HDAC9	0.402728	0.405063	0.306024	0.274752
HIF1A	0.90604	0.151515	0.91129	0.896133
HINFP
HNRNPA2B1	0.141882	0.0904578	0.292222	0.180808
HRAS	1	0.974825	0.128205	0.221865
HSPG2	0.0769231	0.113489	0.0879479	0.110647
HTR3E
IFRD1	0.914414	0.890995	1	1
IL6R	0.972603	0.948207	0.698113	0.816456
IL6ST	0	0.895969	0.881463	0.889197
ILK	0.12	0.237822	0.164122	0.200837
ILK	1	1	1	1
INSR	0.104918	0.269336	0.670827	0.805944
ITGA7	0.00800915	0	0.0265849	0.0315091
ITGA7	0.46875	0.190476	0.342105	0.309091
ITGB5	0.832528	0.832245	0.755705	0.769181
ITPR1	0.0787037	0.0683625	0.130303	0.218462
ITPR1	0.0701754	0.0594714	0.108626	0.104396
JAG2	0.779487	0.491694	0.377143	0.389381
JPH1
KCNAB2	0.391496	0.318043	0.258232	0.21843
KCND3
KCNE3
KCNG3
KCNH1	0	0	0.119835	0.0508475
KCNIP2	0.412088	0.302752
KCNJ15	0	0	0.0111732	0
KCNJ5	0.719298	0.65
KCNK2	0.763158	0.835455	0.682831	0.782178
KCNK2	0.5	0.491713	0.363636	0.309987
KCNK2	0.840054	0.869565	0.867442	0.826087
KCNK2
KCNMA1	0.26	0.191898	0.161725	0.133178
KCNMB3
KCNQ3	0.971751	1	0.971067	1
KCNT2	0.789157	0.618182	0.937695
KCNT2	0.706485
KCNU1	1	1
KCNU1	0.575251	0.703583	1	0.76
KCTD18	0	0	0	0
KCTD20	0.69797	0.582934	0.675362	0.584379
LAMA5		1
LAMA5	0.355932	0.701389
LARGE	0.106195	0.0880829		0
LDB3
LDHA	0.0367776	0.0582726	0.0146751	0.0140281
LDHC	0.451977	0.591449
LDHC	0.597156	0.814433
LEF1	0.273723	0.715655	0.391753
LGALS1	1	1	0	0
LIF	0.906667	0.920188	0.903614	0.904959
LIN54	0.441774	0.514905	0.453368	0.545213
LMCD1	0.881226	0.593284	0.840114	0.825151
LMNA	0.76	0.882353
LMNA	0.521327	1		0
LMNA	0.961905	0.611111	0.914894	1
LRRC23	0.0455764	0.297147	0.0905588	0.168548
LRRC23	0.258449	0.348668	0.663551	0.357309
MBNL1	0.188312	0.159459	0.13109	0.150773
MBNL1	0.592346	0.577759	0.569303	0.573405
MBNL1	0.0596591	0.0670157	0.0770791	0.0816714
MBNL1	0.753639	0.741096	0.803013	0.820633
MCOLN1	0.884023	0.869565	0.861301	0.861847
MCOLN2	0.252336	0.213693	0.0659722	0.153846
MDH2	0.885279	0.901274	0.892927	0.917127
MEF2A	0.943515	0.967093	0.930055	0.930661
MEF2A	0.00641437	0.0107527	0.0159711	0.0142248
MEF2B	0.282609	0.128713	0.368159	0.122257
MEF2B	0.557482	0.525097	0.419886	0.57193
MEF2B	0.936264	0.929791	1	1
MEF2C	0.414993	0.356446	0.52038	0.339031
MEF2D	0.0600162	0.0362216	0	0
MFN2	0.552632	0.756039	0.600473	0.689157
MGEA5	0.918164	0.906	0.879257	0.889564
MGEA5	0.834229	0.879373	0.796809	0.875758
MGRN1	0.405213	0.482347	0.531877	0.590426
MKNK2	0.858974
MORF4L2	0.430668	0.432941	0.344974	0.41329
MORF4L2	0.322581	0.32802	0.256849	0.319277
MORF4L2	0.34003	0.382831	0.318226	0.358757
MOV10L1	0.404605	0.227848	0.334694	0.641509
MOV10L1	0.525424	0.519417	0.590588	0.617414
MOV10L1	0	0	0	0
MOV10L1	0.173077	0.135429	0.435772	0.140143
MTDH	0.794464	0.858462	0.790833	0.836965
MTMR3	0.655889	0.742284	0.574924	0.651599
MUSK	0.357143	0.315534
MUSK	0.537931	0.318548
MUSK	0.852632	0.756303
MYBPC1
MYBPC1	0.586639	0.59132	0.661972	0.681672
MYH15	0.917582	0.88961
MYL12B	0.202497	0.267831	0.152695	0.149618
MYL4	0.101852	0.0752941		0.342342
MYL6	0.395634	0.418321	0.341146	0.36855
MYL9	0.909677	0.880952	0.888889	0.869186
MYLK	0.870793	0.897059	0.900327	0.904437
MYLK	0.0830629	0.0707396	0.119558	0.0958445
MYLK	0.880208	0.870057	0.816456	0.806452
MYLK	0.443773	0.452618	0.4654	0.463869
MYO5A	0.158175	0.247249	0.0709838	0.114497
MYO6	0.715596	0.664804	1	0.717391
MYO7A	0.216495	0.161804
MYO9A	0.257831	0.27789	0.340369	0.350148
MYOCD			0.410042	0.379147
MYOCD	0.782609	0.671429	0.612981	0.926531
MYOM2
NALCN	0.701493
NCOA2	0.487097	0.57971	0.340628	0.515723
NDUFC2-KCTD14	0.429752	0.363636	0.788462	0.237705
NDUFS3	0.413762	0.425995	0.442272	0.465792
NEB	0	0.30303		0.6875
NEB
NEBL
NEO1	0.711429	0.667571	0.811791	0.778261
NEXN	0	0	0	0.0216718
NEXN	0.719687	0.753762	0.730453	0.763557
NEXN	0.681992	0.608133	0.67757	0.655518
NEXN	0.877415	0.914866	0.92638	0.908623
NF1	0.0400593	0.0285714	0.0407332	0.0367347
NOX5	0.349515	0.288889		0
NOX5	1	0.92029	1	0.934959
NRAP
NRAP		1
NRAP
NRD1	0.34347	0.362193	0	0
NRG1	0.364035	1	0.51495	0.346429
NRG1	0.182927	0.2	0.272563	0.295107
NUDT9	0.400802	0.425243	0.423077	0.567029
OBSL1	0.270431	0.388076	0.309091	0.477083
OBSL1	0.144737	0.506211	0.128655	0.242291
OGDH	0.032316	0.0499208	0.0595238	0.368794
OPA1	0.0932945	0.0976234	0.0888889	0.0891505
OPN4
OXTR	0.969014	0.972414	0.943723	0.936585
P2RX5	0.389706	0.703947	0.675532	0.75641
P2RX6	0.846154	0.8486	0.844156	0.795252
P2RX7	0.789744	0.775915		0.876712
P2RX7	0.854167	0.809605	0.9	0.915493
P4HA1	0.097032	0.139066	0.134417	0.132686
PALLD	0	0	0	0
PC		0.245614
PCBD2andCATSPER3	0.768116	0.54		0.558824
PCK2	0.868521	0.760807	0.79691	0.713816
PCK2	0.95682	0.922286	0.96181	0.973843
PCM1	0.42511	0.512894	0.364407	0.411458
PDK1	0.737578	0.912338	0.753593	0.889109
PDK1	0.873754		0.640449
PDLIM3	0.670782
PDLIM5	0.891945	0.882716	0.970982	0.952199
PDLIM5	0.0535077	0.0469974	0.0858806	0.0649171
PFKFB1
PFKL	0.521739		0.246154	0.246988
PFKM	0.0423729		0	0
PGM2	0.844262	0.975052	0.868455	0.966667
PGM3	0.807692	0.8	0.688312	0.809524
PHKA2	0.701342	0.675229	0.891566	0.804734
PHKB	0.364606	0.357741	0.261062	0.241458
PHKG1	0.835938	0.944444	0.69	0.90566
PKD1L2	0.688525	0.788889	0.821429	0.875
PKD1L2
PKD1L2	1	0.836066	1	0.887446
POU6F1	0.619048	0.573171	0.666667	0.442029
POU6F1	0.861423	0.926282	1	0.962766
POU6F1	0.257447	0.2125	0.100946	0.127604
PPARD	0.675325	0.674419	1	1
PPARGC1A	0.05	0.262295	0.32	0.68
PPP1CB	1	1	1	0.980303
PPP1CB	0.993541	1	0.987368	0.984037
PPP1R12B	0.636364	0.78327	0.553991	0.624473
PPP1R1A
PPP1R1A	1	1		1
PPP1R3EandHOMEZandSLC7A8	0.307506	0.394919	0.23445	0.277433
PPP1R3EandHOMEZandSLC7A8	0.327869	0.352332	0.110553	0.121739
PRDM6	1	0.78	1
PRPF18	0.0448485	0.0421179	0.0444894	0.0436364
PSEN2
PTCD2	0.840741	0.840426	0.739812	0.844068
PTCD2	0.863739	0.846682	0.76032	0.758216
PTGS1	0.976898	0.973357	1	1
PTGS1	0.778037	0.783664	0.860465	0.774611
PXN	0.529141	0.515498	0.462848	0.498567
PXN	0.180328	0.182051	0.200389	0.190476
QKI	0.955711	0.954138	0.962652	0.96482
QKI	0.932331	0.941832	0.869063	0.893462
RALY	0.790349	0.768089	0.823344	0.802083
RARB			0.907895
RASA3	0.652174	0.58296	0.53125	0.514286
RBFOX1
RCAN1	0.285714	0.185714	0.347775	0.165354
RRPL13L	0.339005	0.430745	0.36515	0.408297
RYR1
RYR1	0.178571	0.185714	0.222222	0
RYR2
SCN1A
SCN3A
SCN5A
SCN5A
SCN9A	0.321481	0.27186	0.542857	0.355556
SDCBP2	0.1	0	0	0
SGCA	0.365591	0.359606	0.304688	0.292754
SGCA	0.97281	0.827128	0.86532	0.956376
SHKBP1	0.854664	0.929167	0.725806	0.5
SIRT2	0.498008	0.335907	0.075	0.211111
SLC1A4
SLC24A2
SLC25A10	0.537415	0.55	0.729642	0.72973
SLC26A7	0.845238	1	1	0.921053
SLC26A7
SLC2A8	0.603482	0.628631	0.705752	0.804348
SLC2A8	0.376623	0.363636	0.450262	0.45584
SLC2A8	0.957447	0.952141	1	1
SLC2A8	0.737401	0.841424	0.645251	0.572539
SLC37A4
SLC44A2	0.555556	0.346008	0.39	0.436364
SLIT2	0.787417	0.786818	0.537921	0.550125
SLMAP	0.902121	0.899225	0.946827	0.945946
SMAD5	0.861728	0.805158	0.842623	0.712418
SMAD5	0.77628	0.776504	0.714286	0.560748
SMTN	0.190128	0.215686	0.119835	0.149254
SNAP25	1	1	0.514019	0.554878
SORBS1
SORBS1
SORBS1
SORBS1	0.125		0
SORBS1
SORBS2
SORBS2	0.506667
SORBS2
SORBS2	0.745455	0.639344	0.559322	0.610063
SORBS3	0.911243	0.921622	0.900433	0.800797
SOX6	0	0.0821918
SOX6	0.230159	0.401869
SPATA22		0.606061	0.907692	0.836478
SPDYA
SRCAP	0.277856	0.270492	0.390511	0.401754
SRCAPandPHKG2
STBD1	0.732143	0.942623
STBD1	0.409091	0.631944
STIM1		1
SUB1	0.468852	0.342776	0.441624	0.392265
SVIL	0.867495	0.860125	0.870246	0.776995
SVIL	0.0102157	0.0239234	0.0275591	0.0241935
SYNE1	0.70068	0.697133	0.89924	0.910646
SYNE1
SYNE1	0.556439	0.5488	0.385514	0.445705
SYNE1	0.969147	0.959032	0.968354	0.976868
SYNE2	0.65	0.492647	0.517007
TACC2	0.08	0.0506329	0
TAGLN3
TAZ	0.160714
TAZ	0.707182	0.710669	0.64488	0.704698
TBC1D1	0.442971	0.596215	0.772201	0.63142
TBCE	0.877966	0.878676	0.905882	0.918728
TBX3	0.538012	0.563845	0.748588	0.76652
TCF7L2	0.511784	0.557596	0.442656	0.496109
TCF7L2	0.188161	0.252137	0.271739	0.298969
TCF7L2	1	1	1	1
TCF7L2	0.190972	0.127119	0.294872	0.232727
TEAD4
TEAD4	1	1	0.898678	1
TGFB2	0.0833333	0.0719225	0.0892351	0.0702703
THRA	0.898113	0.883636	0.767442	0.903955
TPCN1	0.716475	0.641168	0.694382	0.662551
TPCN2	0.447013	0.315197	0.203804	0.232984
TPCN2	0.930712	0.94533	0.945513	1
TPM3	0.216763	0.169903	0	0.106557
TPM3	0		0	0
TRDN
TRPC1			0.460411	0.427536
TRPM3
TRPM3
TRPM4	0.951977	0.919298	0.874251
TRPM4	0.803191	0.716012	0.58871	0.855721
TRPM4	0.768041	0.621547	0.69103	0.508571
TRPM6
TRPV3	0.628	0.524664	0.778761	0.643836
TRPV4	0.871324	0.8577	0.967391	0.830189
TRPV4	0.508876	0.480687	0.389785	0.430693
TSC1	0.259212	0.230236	0.243045	0.20288
TTN			1
TTN
TTYH2	0.659389	0.769231	0.619529	0.544379
UEVLD	0.871833	0.885615	0.867069	0.821478
UEVLD	0.628272	0.621928	0.67382	0.572451
UGP2	0.134328	0	0.130435	0.0879121
USF1	0.652932	0.678797	0.693374	0.675912
USF1	0.692082	0.688503	0.669553	0.671827
USP5	0.0151025	0.0151188	0.0291616	0.0232288
VAMP8	0.70412	0.573529	0.356522	0.459627
ZEB1	0.790909	0.79845	0.818182
ZEB1	0.573034	0.7875		0.865385
ZMIZ2	0.0862423	0.105981	0.103081	0.106977

## Sheet: DM1 ASEs - Klinck 2014
Klick et al., 2014 (ASEs that change splicing pattern from DM1 to WT conditions either with a PSI>5% indicated by the screen OR ASEs validated in cell lines)
Gene name	Hit cells	delta PSI DM1 - CTL
CACNA1D	NO	-0.728758
JTV1	NO	-0.640765
CAST.b	YES	-0.595042
INSR	YES	-0.590759
ACHE	NO	-0.5
OBSL1.a	NO	-0.495681
TEAD4.a	NO	-0.439338
TRPM4.b	YES	-0.400121
SYNE1.a	NO	-0.358992
KCND3	YES	-0.353475
SMAD5.b	NO	-0.344304
ABCB8	YES	-0.275805
SORBS1.c	YES	-0.258566
SORBS2.b	NO	-0.250241
OBSL1.b	YES	-0.25
LEF1	NO	-0.237677
ATP2A1.b	NO	-0.237193
A2BP1	NO	-0.145767
JPH4andAP1G2.a	NO	-0.132213
TCF7L2.b	YES	-0.130382
MUSK.a	NO	-0.114051
CHRND.a	NO	-0.112852
BMP4	NO	-0.112218
CLCC1.c	YES	-0.107102
PTGS1.a	NO	-0.105914
MYL6	NO	-0.102779
DUSP12	NO	-0.091568
SORBS1.a	YES	-0.090994
AKR1A1.c	NO	-0.0844509
TPCN2.a	NO	-0.0734393
MYO5A	NO	-0.0712775
QKI.b	NO	-0.0702845
NF1	YES	-0.065973
CLCN2.b	NO	-0.0630806
APC.a	YES	-0.0622909
PFKM	YES	-0.0605277
QKI.a	YES	-0.0571781
ANK2.d	NO	-0.0524573
NEO1	NO	-0.0505091
PHKA2	NO	-0.045435
NEXN.a	NO	-0.0369489
SCN9A	YES	-0.0357579
DMD.a	YES	-0.0339915
SMTN	YES	-0.0263157
ARHGEF11	YES	-0.0261712
TPM3.b	YES	-0.0240025
PDK1.a	YES	-0.0226498
TTYH2	YES	-0.0144898
BIN1.b	YES	-0.0123498
TCF7L2.a	YES	-0.00462035
ITPR1.b	YES	-0.0040867
TGFB2	YES	-0.00408022
FXR1.a	YES	-0.00392625
TACC2	YES	-0.00223085
FLNC	YES	-0.00125892
SLC26A7.a	YES	0
TTN.b	YES	0
PDLIM3	YES	0.00109696
ACTN1.b	YES	0.0013016
SLMAP	YES	0.00268378
PPP1R12B	YES	0.0050998
GABRA2.b	YES	0.009217
CHRNG	YES	0.0150005
COL4A3BP.b	YES	0.0152688
MBNL1.b	YES	0.0178017
MEF2A.b	YES	0.0285417
ANO10	YES	0.0305541
CAMK2G.a	YES	0.0338168
CSDA	NO	0.0456568
LAMA5.a	NO	0.046198
SORBS1.b	YES	0.0509483
MORF4L2.c	NO	0.0510471
SORBS2.a	NO	0.0520031
AKR1A1.b	NO	0.057674
MTDH	NO	0.0586213
PRPF18	NO	0.0586305
DTNA.b	YES	0.0685821
CLCN6.c	NO	0.0806039
TRPV4.a	NO	0.0876599
CDK5	NO	0.101971
MGEA5.a	YES	0.102911
SGCA.b	NO	0.105034
RYR1.a	NO	0.105792
MEF2D	YES	0.106817
HCN3	NO	0.11017
ANK2.c	YES	0.11877
ILK.a	NO	0.127271
SYNE1.b	YES	0.137027
DTNA.a	NO	0.142257
USP5	NO	0.142927
TRPC1	NO	0.144544
SLC24A2	NO	0.144605
KCNK2.b	NO	0.157413
SYNE1.d	NO	0.164237
RYR2	NO	0.166667
ITGA7.a	NO	0.225023
CACNA1C.d	YES	0.233766
TRPM4.c	YES	0.274733
EVC	NO	0.321812
TTN.a	YES	0.400013
CACNA1C.c	NO	#DIV/0!
CACNA1H	NO	#DIV/0!
CHRNA5	NO	#DIV/0!
PSEN2	NO	#DIV/0!

## Sheet: DM1 ASEs common to both 
All ASEs tested in Klinck et al	ASEs that ares hits in DM1 from Klinck et al., 2014	ASEs in Cote/Jasmin with >5% PSI change from WT to DM1			ASEs common to both			ASEs that show PSI change in DM1 vs WT adult in each screen	Total ASEs compared
A2BP1	A2BP1	ABCB8			ABCB8
ABCB8	ABCB8	ACHE			ACHE		Klick et al., 2014	104	163
ACHE	ACHE	ACTN1b			ACTN1b		Jasmin Lab Screen	80*	163	*These 80 ASEs are only events that were also checked in the Klinck et al. Screen. Out of the total 487 ASEs checked in our screen 170 ASEs showed dPSI from DM1 vs WT
ACTN1.b	ACTN1.b	AKR1A1a			AKR1A1b		Common	54
AKR1A1.a	AKR1A1.b	AKR1A1b			AKR1A1c
AKR1A1.b	AKR1A1.c	AKR1A1c			ANK2d
AKR1A1.c	ANK2.c	ANK2d			ANO10a
ANK2.a	ANK2.d	ANO10a			APC
ANK2.b	ANO10	APC			ARHGEF11
ANK2.c	APC.a	ARHGEF11			CACNA1C
ANK2.d	ARHGEF11	ASPH			CAMK2G
ANO10	ATP2A1.b	CACNA1C			CAST
ANXA6	BIN1.b	CALD1			CDK5
APC.a	BMP4	CAMK2G			CHRNA5
ARHGEF11	CACNA1C.c	CAST			CHRNG
ASPH	CACNA1C.d	CAST			CLCC1
ATP2A1.b	CACNA1D	CDK5			CLCN2
BIN1.b	CACNA1H	CHRNA1			CSDA
BMP4	CAMK2G.a	CHRNA5			DMD
CACNA1C.a	CAST.b	CHRNG			DTNA
CACNA1C.c	CDK5	CLCC1			DUSP12
CACNA1C.d	CHRNA5	CLCN2			EVC
CACNA1D	CHRND.a	CREM			HCN3
CACNA1H	CHRNG	CSDA			INSR
CALD1	CLCC1.c	DMD			ITPR1
CAMK2G.a	CLCN2.b	DTNA			JPH4 - AP1G2a
CAST.b	CLCN6.c	DUSP12			KCNK2
CAST.c	COL4A3BP.b	ENO3			LEF1
CDK5	CSDA	EVC			MEF2D
CHRNA1	DMD.a	FKTN			MORF4L2
CHRNA5	DTNA.a	GANC			MUSK
CHRND.a	DTNA.b	HCN3			MYL6
CHRND.b	DUSP12	HDAC10			MYO5A
CHRNG	EVC	HDAC3			NEO1
CLCC1.c	FLNC	INSR			PDLIM3
CLCN2.b	FXR1.a	ITPR1			PHKA2
CLCN6.c	GABRA2.b	JPH4 - AP1G2a			PPP1R12B
COL4A3BP.b	HCN3	KCNH1			QKI
CREM.e	ILK.a	KCNK2			SCN9A
CSDA	INSR	LEF1			SGCA
DMD.a	ITGA7.a	MEF2D			SMAD5
DMWDandDMPK	ITPR1.b	MORF4L2			SMTN
DTNA.a	JPH4andAP1G2.a	MORF4L2			SORBS2
DTNA.b	JTV1	MOV10L1			SYNE1
DUSP12	KCND3	MTMR3			SYNE2
DYSF.a	KCNK2.b	MUSK			TACC2
ENO3.a	LAMA5.a	MYL6			TCF7L2
ENO3.b	LEF1	MYLK			TCF7L2
EVC	MBNL1.b	MYO5A			TPCN2
FKTN	MEF2A.b	NEO1			TRPC1
FLNB	MEF2D	PCBD2andCATSPER3			TRPM4
FLNC	MGEA5.a	PCM1			TRPM4
FXR1.a	MORF4L2.c	PDLIM3			TRPV4
GABRA2.b	MTDH	PHKA2			TTN
GANCandCAPN3.a	MUSK.a	PHKB
GANCandCAPN3.b	MYL6	PPP1R12B
HCN3	MYO5A	PTCD2
HDAC10	NEO1	QKI
HDAC3	NEXN.a	SCN9A
HIF1A	NF1	SGCA
HSPG2	OBSL1.a	SIRT2
ILK.a	OBSL1.b	SLC26A7
INSR	PDK1.a	SLC44A2
ITGA7.a	PDLIM3	SMAD5
ITPR1.a	PFKM	SMTN
ITPR1.b	PHKA2	SORBS2
JPH4andAP1G2.a	PPP1R12B	SYNE1
JPH4andAP1G2.b	PRPF18	SYNE2
JTV1	PSEN2	TACC2
KCND3	PTGS1.a	TAZ
KCNH1	QKI.a	TBC1D1
KCNK2.b	QKI.b	TCF7L2
LAMA5.a	RYR1.a	TCF7L2
LEF1	RYR2	TPCN2
LMCD1	SCN9A	TRPC1
MBNL1.b	SGCA.b	TRPM4
MDH2	SLC24A2	TRPM4
MEF2A.a	SLC26A7.a	TRPV4
MEF2A.b	SLMAP	TRPV4
MEF2D	SMAD5.b	TTN
MGEA5.a	SMTN	UEVLD
MORF4L2.a	SORBS1.a
MORF4L2.b	SORBS1.b
MORF4L2.c	SORBS1.c
MOV10L1.d	SORBS2.a
MTDH	SORBS2.b
MTMR3	SYNE1.a
MUSK.a	SYNE1.b
MYL6	SYNE1.d
MYLK.c	TACC2
MYO5A	TCF7L2.a
NEB.a	TCF7L2.b
NEBL	TEAD4.a
NEO1	TGFB2
NEXN.a	TPCN2.a
NEXN.b	TPM3.b
NEXN.c	TRPC1
NF1	TRPM4.b
N-PAC	TRPM4.c
OBSL1.a	TRPV4.a
OBSL1.b	TTN.a
PALLD	TTN.b
PCBD2andCATSPER3.b	TTYH2
PCM1	USP5
PDK1.a
PDLIM3
PDLIM5.b
PFKM
PHKA2
PHKB
PPP1CB
PPP1R12B
PRPF18
PSEN2
PTCD2.a
PTGS1.a
QKI.a
QKI.b
RYR1.a
RYR1.b
RYR2
SCN9A
SGCA.b
SIRT2
SLC24A2
SLC26A7.a
SLC2A8.c
SLC37A4
SLC44A2
SLMAP
SMAD5.a
SMAD5.b
SMTN
SORBS1.a
SORBS1.b
SORBS1.c
SORBS1.e
SORBS2.a
SORBS2.b
SYNE1.a
SYNE1.b
SYNE1.d
SYNE2
TACC2
TAZ.b
TBC1D1
TCF7L2.a
TCF7L2.b
TEAD4.a
TGFB2
TPCN1
TPCN2.a
TPM3.b
TRPC1
TRPM4.b
TRPM4.c
TRPV4.a
TTN.a
TTN.b
TTYH2
UEVLD.b
USP5
ZMIZ2

## Sheet: MBNL1 and Stau1
Gene name	∆PSI MBNL1 KD - control Fibroblast (Klinck et al., 2014)	MBNL-Fibroblast Hit?		Gene name	∆PSI Stau1 OE - GFP CTRL (Cote/Jasmin Lab)	Stau1-GFP CTRL Hit?		Common to both screens		Direction of splicing regulation
APC.a	0.936819	YES		ABCC4	-0.110448	YES		CACNA1C.c		9 Same
ARHGEF11	0.293948	YES		ACTN1b	-0.06499	YES		DMD.a		13 Opposite
ATP2A1.b	0.415225	YES		ADORA2A	0.106061	YES		ENO3.b
CACNA1C.c	-0.051327	YES		ADPGKa	0.068226	YES		EVC
CACNA1D	0.413793	YES		ADPGKb	-0.068251	YES		GANCandCAPN3.b
CAST.b	1	YES		AKR1A1a	-0.115613	YES		INSR
CAST.c	-0.057462	YES		ANK2d	-0.121965	YES		KCNH1
CHRNA5	0.23416	YES		ANK2e	-0.218748	YES		KCNK2.b
CLCC1.c	0.061657	YES		ANKRD23	-0.187208	YES		MGEA5.a
CSDA	0.0981468	YES		ANKRD39andANKRD23	0.099254	YES		OBSL1.b
DMD.a	-0.188539	YES		ANO10b	0.101068	YES		PHKA2
DYSF.a	0.194389	YES		AP1G2a	-0.109931	YES		PPP1R12B
ENO3.b	0.129127	YES		ARF1	-0.123563	YES		PTGS1.a
EVC	-0.062452	YES		ARHGEF25	-0.074107	YES		SCN9A
FKTN	0.234624	YES		ASIC3	0.071162	YES		SGCA.b
GANCandCAPN3.b	0.073953	YES		ASPH	0.14025	YES		SLC2A8.c
HCN3	0.101887	YES		C10orf58	0.16044	YES		SMAD5.a
HDAC10	-0.197222	YES		CACNA1B	-0.203489	YES		SYNE1.a
ILK.a	-0.095959	YES		CACNA1C	-0.239583	YES		TBC1D1
INSR	-0.372808	YES		CACNA1C	-0.119026	YES		TRPM4.b
KCNH1	0.109263	YES		CACNB4	0.152098	YES		TRPM4.c
KCNK2.b	-0.054503	YES		CAPN3	-0.135436	YES		TTYH2
LEF1	-0.158185	YES		CAPN3	0.052112	YES
MGEA5.a	0.92602	YES		CATSPER3	-0.290909	YES
MYL6	-0.38325	YES		CCDC19	-0.0627347	YES
NEB.a	0.323529	YES		CLCN2	-0.172524	YES
OBSL1.b	0.302474	YES		CNGA3	0.115103	YES
PDLIM3	0.296554	YES		CPS1	0.0951516	YES
PHKA2	0.906015	YES		CPT1B	0.078547	YES
PHKB	0.129396	YES		CREM	-0.334008	YES
PPP1R12B	0.684444	YES		CREM	-0.166801	YES
PSEN2	-1	YES		CREM	0.102169	YES
PTGS1.a	0.970112	YES		CREM	0.12756	YES		22 ASEs the same
SCN9A	0.196931	YES		DHTKD1	0.059215	YES
SGCA.b	0.937608	YES		DMD	-0.102168	YES
SLC2A8.c	-0.076042	YES		DNER	-0.125	YES
SLC44A2	-0.11138	YES		DNM1L	0.0909861	YES
SMAD5.a	0.055395	YES		DTNA	0.505556	YES
SMTN	0.058977	YES		DVL1	0.055864	YES
SORBS1.a	-0.09523	YES		DYRK2	-0.144259	YES
SYNE1.a	-0.434933	YES		EDNRA	0.100753	YES
SYNE1.d	0.365698	YES		ENO1	0.060606	YES
SYNE2	-0.102685	YES		ENO3	-0.06469	YES
TBC1D1	-0.354565	YES		ENO3	0.158671	YES
TGFB2	-0.0678896	YES		EVC	-0.066123	YES
TPCN1	0.050235	YES		FLNC	-0.075234	YES
TRPM4.b	0.167049	YES		G6PC3	-0.341147	YES
TRPM4.c	0.094812	YES		GANC	0.0925077	YES
TTN.b	-1	YES		GANC	0.125864	YES
TTYH2	-0.107245	YES		GAR1	-0.056844	YES
				GLRB	0.06949	YES
				HDAC9	0.229144	YES
				HNRNPA2B1	0.111414	YES
				HRAS	-0.09366	YES
				IL6R	-0.118343	YES
				INSR	-0.135117	YES
				ITPR1	-0.088159	YES
				KCNH1	0.0689875	YES
				KCNK2	-0.099347	YES
				KCNK2	0.053649	YES
				KCNU1	0.24	YES
				KCTD20	0.090983	YES
				LIN54	-0.091845	YES
				LMNA	-0.085106	YES
				LRRC23	-0.0779892	YES
				LRRC23	0.306242	YES
				MCOLN2	-0.0878738	YES
				MEF2B	-0.152044	YES
				MEF2B	0.245902	YES
				MEF2C	0.181349	YES
				MFN2	-0.088684	YES
				MGEA5	-0.078949	YES
				MGRN1	-0.058549	YES
				MORF4L2	-0.068316	YES
				MORF4L2	-0.062428	YES
				MOV10L1	-0.306815	YES
				MOV10L1	0.295629	YES
				MTMR3	-0.076675	YES
				MYO6	0.282609	YES
				MYOCD	-0.31355	YES
				NCOA2	-0.175095	YES
				NDUFC2-KCTD14	0.550757	YES
				NOX5	0.065041	YES
				NRG1	0.168521	YES
				NUDT9	-0.143952	YES
				OBSL1	-0.167992	YES
				OBSL1	-0.113636	YES
				OGDH	-0.30927	YES
				P2RX5	-0.080878	YES
				P2RX6	0.048904	YES
				PCK2	0.083094	YES
				PDK1	-0.135516	YES
				PGM2	-0.098212	YES
				PGM3	-0.121212	YES
				PHKA2	0.086832	YES
				PHKG1	-0.21566	YES
				PKD1L2	-0.053571	YES
				PKD1L2	0.112554	YES
				POU6F1	0.224638	YES
				PPARGC1A	-0.36	YES
				PPP1R12B	-0.070482	YES
				PTCD2	-0.104256	YES
				PTGS1	0.085854	YES
				RCAN1	0.182421	YES
				RYR1	0.222222	YES
				SCN9A	0.187301	YES
				SGCA	-0.091056	YES
				SHKBP1	0.225806	YES
				SIRT2	-0.136111	YES
				SLC26A7	0.078947	YES
				SLC2A8	-0.098596	YES
				SLC2A8	0.072712	YES
				SMAD5	0.130205	YES
				SMAD5	0.153538	YES
				SORBS2	-0.050741	YES
				SORBS3	0.099636	YES
				SPATA22	0.071214	YES
				SUB1	0.049359	YES
				SVIL	0.093251	YES
				SYNE1	-0.060191	YES
				TAZ	-0.059818	YES
				TBC1D1	0.140781	YES
				TCF7L2	-0.053453	YES
				TCF7L2	0.062145	YES
				TEAD4	-0.101322	YES
				THRA	-0.136513	YES
				TPCN2	-0.054487	YES
				TPM3	-0.106557	YES
				TRPM4	-0.267011	YES
				TRPM4	0.182459	YES
				TRPV3	0.134925	YES
				TRPV4	0.137202	YES
				TTYH2	0.07515	YES
				UEVLD	0.101369	YES
				VAMP8	-0.103105	YES
				ABCC4
				ACTN1b
				ADORA2A
				ADPGKa
				ADPGKb
				AKR1A1a
				ANK2d
				ANK2e
				ANKRD23
				ANKRD39andANKRD23
				ANO10b
				AP1G2a
				ARF1
				ARHGEF25
				ASIC3
				ASPH
				C10orf58
				CACNA1B
				CACNA1C
				CACNA1C
				CACNB4
				CAPN3
				CAPN3
				CATSPER3
				CCDC19
				CLCN2
				CNGA3
				CPS1
				CPT1B
				CREM
				CREM
				CREM
				CREM
				DHTKD1
				DMD
				DNER
				DNM1L
				DTNA
				DVL1
				DYRK2
				EDNRA
				ENO1
				ENO3
				ENO3
				EVC
				FLNC
				G6PC3
				GANC
				GANC
				GAR1
				GLRB
				HDAC9
				HNRNPA2B1
				HRAS
				IL6R
				INSR
				ITPR1
				KCNH1
				KCNK2
				KCNK2
				KCNU1
				KCTD20
				LIN54
				LMNA
				LRRC23
				LRRC23
				MCOLN2
				MEF2B
				MEF2B
				MEF2C
				MFN2
				MGEA5
				MGRN1
				MORF4L2
				MORF4L2
				MOV10L1
				MOV10L1
				MTMR3
				MYO6
				MYOCD
				NCOA2
				NDUFC2-KCTD14
				NOX5
				NRG1
				NUDT9
				OBSL1
				OBSL1
				OGDH
				P2RX5
				P2RX6
				PCK2
				PDK1
				PGM2
				PGM3
				PHKA2
				PHKG1
				PKD1L2
				PKD1L2
				POU6F1
				PPARGC1A
				PPP1R12B
				PTCD2
				PTGS1
				RCAN1
				RYR1
				SCN9A
				SGCA
				SHKBP1
				SIRT2
				SLC26A7
				SLC2A8
				SLC2A8
				SMAD5
				SMAD5
				SORBS2
				SORBS3
				SPATA22
				SUB1
				SVIL
				SYNE1
				TAZ
				TBC1D1
				TCF7L2
				TCF7L2
				TEAD4
				THRA
				TPCN2
				TPM3
				TRPM4
				TRPM4
				TRPV3
				TRPV4
				TTYH2
				UEVLD
				VAMP8

## Sheet: RBFOX1 and Stau1
Gene name	∆PSI RBFOX1 KD - control Fibroblast (Klinck et al., 2014)	RBFOX1-Fibroblast Hit?		Gene name	∆PSI Stau1 OE - GFP CTRL (Cote/Jasmin Lab)	Stau1-GFP CTRL Hit?		Common to both screens		Direction of splicing regulation
AKR1A1.a	-0.055001	YES		ABCC4	-0.110448	YES		AKR1A1a		7 Same
ANK2.d	-0.569417	YES		ACTN1b	-0.06499	YES		ANK2d		12 Opposite
CACNA1C.c	-0.121384	YES		ADORA2A	0.106061	YES		CACNA1C
CACNA1D	0.673077	YES		ADPGKa	0.068226	YES		CLCN2
CAST.c	-0.166215	YES		ADPGKb	-0.068251	YES		DTNA
CHRNA5	0.113	YES		AKR1A1a	-0.115613	YES		ENO3
CLCC1.c	0.061657	YES		ANK2d	-0.121965	YES		EVC
CLCN2.b	0.049875	YES		ANK2e	-0.218748	YES		GANC
CSDA	-0.058134	YES		ANKRD23	-0.187208	YES		INSR
DTNA.a	0.534784	YES		ANKRD39andANKRD23	0.099254	YES		KCNH1
DYSF.a	-0.182857	YES		ANO10b	0.101068	YES		MOV10L1
ENO3.b	0.239125	YES		AP1G2a	-0.109931	YES		OBSL1
EVC	-0.065864	YES		ARF1	-0.123563	YES		OBSL1
FLNB	0.047319	YES		ARHGEF25	-0.074107	YES		CATSPER3
GANCandCAPN3.a	-0.062117	YES		ASIC3	0.071162	YES		SIRT2
HCN3	0.101887	YES		ASPH	0.14025	YES		SLC2A8
INSR	-0.527613	YES		C10orf58	0.16044	YES		SORBS2
KCNH1	0.0846559	YES		CACNA1B	-0.203489	YES		SYNE1
LEF1	0.163501	YES		CACNA1C	-0.239583	YES		TAZ
MBNL1.b	0.239874	YES		CACNA1C	-0.119026	YES
MOV10L1.d	0.220146	YES		CACNB4	0.152098	YES
MYL6	-0.428061	YES		CAPN3	-0.135436	YES
MYO5A	0.0464538	YES		CAPN3	0.052112	YES
NEB.a	0.191176	YES		CATSPER3	-0.290909	YES
NEXN.c	0.059097	YES		CCDC19	-0.0627347	YES
OBSL1.a	0.177232	YES		CLCN2	-0.172524	YES
OBSL1.b	-0.050249	YES		CNGA3	0.115103	YES
PCBD2andCATSPER3.b	-0.0704709	YES		CPS1	0.0951516	YES
PCM1	0.053975	YES		CPT1B	0.078547	YES
PDLIM3	0.058839	YES		CREM	-0.334008	YES
PHKB	-0.123766	YES		CREM	-0.166801	YES
PSEN2	-1	YES		CREM	0.102169	YES
SIRT2	-0.149401	YES		CREM	0.12756	YES		22 ASEs the same
SLC2A8.c	-0.076328	YES		DHTKD1	0.059215	YES
SLC44A2	0.256844	YES		DMD	-0.102168	YES
SORBS2.a	0.073324	YES		DNER	-0.125	YES
SYNE1.a	-0.090599	YES		DNM1L	0.0909861	YES
SYNE1.d	-0.147438	YES		DTNA	0.505556	YES
SYNE2	-0.727289	YES		DVL1	0.055864	YES
TAZ.b	0.045259	YES		DYRK2	-0.144259	YES
TPCN1	0.073184	YES		EDNRA	0.100753	YES
TPCN2.a	0.079837	YES		ENO1	0.060606	YES
TRPM4.b	-0.234661	YES		ENO3	-0.06469	YES
TTN.b	-1	YES		ENO3	0.158671	YES
TGFB2	-0.0678896	YES		EVC	-0.066123	YES
TPCN1	0.050235	YES		FLNC	-0.075234	YES
TRPM4.b	0.167049	YES		G6PC3	-0.341147	YES
TRPM4.c	0.094812	YES		GANC	0.0925077	YES
TTN.b	-1	YES		GANC	0.125864	YES
TTYH2	-0.107245	YES		GAR1	-0.056844	YES
				GLRB	0.06949	YES
				HDAC9	0.229144	YES
				HNRNPA2B1	0.111414	YES
				HRAS	-0.09366	YES
				IL6R	-0.118343	YES
				INSR	-0.135117	YES
				ITPR1	-0.088159	YES
				KCNH1	0.0689875	YES
				KCNK2	-0.099347	YES
				KCNK2	0.053649	YES
				KCNU1	0.24	YES
				KCTD20	0.090983	YES
				LIN54	-0.091845	YES
				LMNA	-0.085106	YES
				LRRC23	-0.0779892	YES
				LRRC23	0.306242	YES
				MCOLN2	-0.0878738	YES
				MEF2B	-0.152044	YES
				MEF2B	0.245902	YES
				MEF2C	0.181349	YES
				MFN2	-0.088684	YES
				MGEA5	-0.078949	YES
				MGRN1	-0.058549	YES
				MORF4L2	-0.068316	YES
				MORF4L2	-0.062428	YES
				MOV10L1	-0.306815	YES
				MOV10L1	0.295629	YES
				MTMR3	-0.076675	YES
				MYO6	0.282609	YES
				MYOCD	-0.31355	YES
				NCOA2	-0.175095	YES
				NDUFC2-KCTD14	0.550757	YES
				NOX5	0.065041	YES
				NRG1	0.168521	YES
				NUDT9	-0.143952	YES
				OBSL1	-0.167992	YES
				OBSL1	-0.113636	YES
				OGDH	-0.30927	YES
				P2RX5	-0.080878	YES
				P2RX6	0.048904	YES
				PCK2	0.083094	YES
				PDK1	-0.135516	YES
				PGM2	-0.098212	YES
				PGM3	-0.121212	YES
				PHKA2	0.086832	YES
				PHKG1	-0.21566	YES
				PKD1L2	-0.053571	YES
				PKD1L2	0.112554	YES
				POU6F1	0.224638	YES
				PPARGC1A	-0.36	YES
				PPP1R12B	-0.070482	YES
				PTCD2	-0.104256	YES
				PTGS1	0.085854	YES
				RCAN1	0.182421	YES
				RYR1	0.222222	YES
				SCN9A	0.187301	YES
				SGCA	-0.091056	YES
				SHKBP1	0.225806	YES
				SIRT2	-0.136111	YES
				SLC26A7	0.078947	YES
				SLC2A8	-0.098596	YES
				SLC2A8	0.072712	YES
				SMAD5	0.130205	YES
				SMAD5	0.153538	YES
				SORBS2	-0.050741	YES
				SORBS3	0.099636	YES
				SPATA22	0.071214	YES
				SUB1	0.049359	YES
				SVIL	0.093251	YES
				SYNE1	-0.060191	YES
				TAZ	-0.059818	YES
				TBC1D1	0.140781	YES
				TCF7L2	-0.053453	YES
				TCF7L2	0.062145	YES
				TEAD4	-0.101322	YES
				THRA	-0.136513	YES
				TPCN2	-0.054487	YES
				TPM3	-0.106557	YES
				TRPM4	-0.267011	YES
				TRPM4	0.182459	YES
				TRPV3	0.134925	YES
				TRPV4	0.137202	YES
				TTYH2	0.07515	YES
				UEVLD	0.101369	YES
				VAMP8	-0.103105	YES
				ABCC4
				ACTN1b
				ADORA2A
				ADPGKa
				ADPGKb
				AKR1A1a
				ANK2d
				ANK2e
				ANKRD23
				ANKRD39andANKRD23
				ANO10b
				AP1G2a
				ARF1
				ARHGEF25
				ASIC3
				ASPH
				C10orf58
				CACNA1B
				CACNA1C
				CACNA1C
				CACNB4
				CAPN3
				CAPN3
				CATSPER3
				CCDC19
				CLCN2
				CNGA3
				CPS1
				CPT1B
				CREM
				CREM
				CREM
				CREM
				DHTKD1
				DMD
				DNER
				DNM1L
				DTNA
				DVL1
				DYRK2
				EDNRA
				ENO1
				ENO3
				ENO3
				EVC
				FLNC
				G6PC3
				GANC
				GANC
				GAR1
				GLRB
				HDAC9
				HNRNPA2B1
				HRAS
				IL6R
				INSR
				ITPR1
				KCNH1
				KCNK2
				KCNK2
				KCNU1
				KCTD20
				LIN54
				LMNA
				LRRC23
				LRRC23
				MCOLN2
				MEF2B
				MEF2B
				MEF2C
				MFN2
				MGEA5
				MGRN1
				MORF4L2
				MORF4L2
				MOV10L1
				MOV10L1
				MTMR3
				MYO6
				MYOCD
				NCOA2
				NDUFC2-KCTD14
				NOX5
				NRG1
				NUDT9
				OBSL1
				OBSL1
				OGDH
				P2RX5
				P2RX6
				PCK2
				PDK1
				PGM2
				PGM3
				PHKA2
				PHKG1
				PKD1L2
				PKD1L2
				POU6F1
				PPARGC1A
				PPP1R12B
				PTCD2
				PTGS1
				RCAN1
				RYR1
				SCN9A
				SGCA
				SHKBP1
				SIRT2
				SLC26A7
				SLC2A8
				SLC2A8
				SMAD5
				SMAD5
				SORBS2
				SORBS3
				SPATA22
				SUB1
				SVIL
				SYNE1
				TAZ
				TBC1D1
				TCF7L2
				TCF7L2
				TEAD4
				THRA
				TPCN2
				TPM3
				TRPM4
				TRPM4
				TRPV3
				TRPV4
				TTYH2
				UEVLD
				VAMP8

## Sheet: Alu subfamilies in Stau1 ASEs
Name of Stau1 ASE (>15% PSI)									Alus
									AluSq2	AluY	AluJb	AluJr	AluSg	AluSp	AluSx	AluSx1	AluSz	AluSz6	AluSc8	AluSx3	AluYk2	AluSc	AluYa5	AluSc5	AluJo	AluYb8	AluSq	AluSg4	AluSg7	AluYj4	AluYm1	AluYb9	AluSx4	AluYc	AluJr4	AluSq10	AluYh3	AluYk3	AluYk11	AluYe6	AluSq4	AluYe5	AluYc3
ANK2.e10.F1 ANK2.e10.R1	ANK2	ANK2.e10.F1	ANK2.e10.R1	195	378	201 380 470 810	AGCGTGTTGTATTGAAGAGTGACA	CTTGCAGAAATGCCGAAGGAGC	0	1	0	0	0	0	1	1	0	0	0	0	0	0	0	0	0	0	0	0	0	0	0	0	0	0	0	0	0	0	0	0	0	0	0
DSCR1.e02.F1 DSCR1.e01.R1	DSCR1;RCAN1	DSCR1.e02.F1	DSCR1.e01.R1	125	331	472 907 1238	CGGGGAATGCAAGGAGAGCAA	CGGAGAAGGGGTTGCTGAAGTT	0	0	0	0	0	0	0	1	0	0	0	0	0	0	0	0	0	0	0	0	0	0	0	0	0	0	0	0	0	0	0	0	0	0	0
PHKG1.e02.F1 PHKG1.e02.R1	PHKG1	PHKG1.e02.F1	PHKG1.e02.R1	267	294	239 390	TTAGCAGTGTGGTCAGGCGATG	TGGTTTCCTTCTCACTCAAGGTG	2	0	0	0	0	0	0	0	0	0	0	0	0	0	0	0	0	0	0	0	0	0	0	0	0	0	0	0	0	0	0	0	0	0	0
MYOCD.e03.F1 MYOCD.e03.R1	MYOCD	MYOCD.e03.F1	MYOCD.e03.R1	159	288	113 114 212 214 286	ATTCTTCCAGCCTCCACCCG	CTCCGCTTTCAATAAGCACGTC	1	0	0	0	0	0	1	0	0	0	0	0	0	0	0	0	0	0	0	0	0	0	0	0	0	0	0	0	0	0	0	0	0	0	0
KCNU1.e06.F1 KCNU1.e06.R1	BK_channel_a.0;KCNU1	KCNU1.e06.F1	KCNU1.e06.R1	151	264	303	CGCTCTTGTCTGGAAGAAACCG	TGCTGAAGGGTATGGCACAAA	0	0	0	0	0	0	0	0	0	0	0	0	0	0	0	0	0	0	0	0	0	0	0	0	0	0	0	0	0	0	0	0	0	0	0
CLCN2.e02.F1 CLCN2.e02.R1 (exon 13)	CLCN2	CLCN2.e02.F1	CLCN2.e02.R1	125	230		AGTGACGCGGACCTGGAAGG	TCCTTTAGAGTAACGATTCCAATGAGT	1	0	1	0	0	0	0	0	0	0	0	0	0	0	0	0	0	0	0	0	0	0	0	0	0	0	0	0	0	0	0	0	0	0	0
FOX.PGM2.F1 FOX.PGM2.R1	PGM2	FOX.PGM2.F1	FOX.PGM2.R1	160	350		GTCCACTTCTCCACAATCCGAG	TGCCACAGCAAGTCTATCAGCA	0	0	1	0	0	1	0	0	0	2	0	0	0	0	0	0	0	0	0	0	0	0	0	0	0	0	0	0	0	0	0	0	0	0	0
TRPM4.e08.F1 TRPM4.e08.R1	TRPM4	TRPM4.e08.F1	TRPM4.e08.R1	220	333		TCTGAGGATGGGTCTGAGGAAT	AAGGTTGCGGATGAGCGAGTT	0	2	2	1	1	2	0	2	0	0	1	1	0	0	0	0	0	0	0	0	0	0	0	0	0	0	0	0	0	0	0	0	0	0	0
PPP1R12B.e04.F1 PPP1R12B.e04.R1	PPP1R12B	PPP1R12B.e04.F1	PPP1R12B.e04.R1	176	400	366	TGGAGGGATGAAGCAAAAGGAA	GGAAGAGGGCGATTGGTGATC	0	0	0	0	0	0	0	0	0	0	1	0	0	0	0	0	0	0	0	0	0	0	0	0	0	0	0	0	0	0	0	0	0	0	0
DT.e16.F1 DT.e16.R1	DT	DT.e16.F1	DT.e16.R1	165	214	196	ATGAAAATGACTCTGTCCGGCA	AACCCCAAAATAACACACGCCA	0	0	0	1	0	0	0	0	0	0	0	0	0	0	0	0	0	0	0	0	0	0	0	0	1	0	0	0	0	0	0	0	0	0	0
CREM.e15.F1 CREM.e15.R1	CREM	CREM.e15.F1	CREM.e15.R1	151	340	89 288	TCTGATGTGCCTGGTGTTCCC	TGTGACTTGGGGCAAGTTCAGT	1	2	0	1	1	1	3	1	0	0	0	0	0	0	0	0	0	0	1	0	0	0	0	0	0	0	0	1	0	0	0	0	0	0	0
TBC1D1.m2h03.F1 TBC1D1.m2h03.R1	TBC1D1	TBC1D1.m2h03.F1	TBC1D1.m2h03.R1	150	270		GCTCCTCCACCTCGTCTTAACC	AGTCCCACCAGAATCACCAAGA	0	0	0	0	0	0	0	0	1	0	0	0	0	0	0	0	0	0	0	0	0	0	0	0	0	0	0	0	0	0	0	0	0	0	0
MEF2B.e04.F1 MEF2B.e04.R1	LOC729991-MEF2B;MEF2B	MEF2B.e04.F1	MEF2B.e04.R1	134	325	89 251 470	ACCCATTTCTCTTGCGTGAATATTG	ATTCCTTTGGTCCAGGATGCGG	0	0	1	1	0	0	0	0	1	0	0	0	0	0	0	0	0	0	0	1	0	0	0	0	1	0	0	0	0	0	0	0	0	0	0
SLC26A7.e01.F1 SLC26A7.e01.R1	LRRC69andSLC26A7;SLC26A7	SLC26A7.e01.F1	SLC26A7.e01.R1	241	324	364	TGAAAACATCAAGTCTGTGCGAC	TGAGCAAGAGCCAGTGAGGC	0	0	0	0	0	0	0	0	0	0	0	0	0	0	0	0	0	0	0	0	0	0	0	0	0	0	0	0	0	0	0	0	0	0	0
CHR5.e03.F1 CHR5.e03.R1	CHR5	CHR5.e03.F1	CHR5.e03.R1	464	1002	215 452 923	GCAGATGGACGTTTTGAAGGGA	TGGGAGGCTTCACTTATTTGCA	0	0	0	0	0	0	0	0	1	0	0	0	0	0	0	0	0	0	0	0	0	0	0	0	1	0	0	0	0	0	0	0	0	0	0
FOX.SYNE2.F1 FOX.SYNE2.R1	SYNE2	FOX.SYNE2.F1	FOX.SYNE2.R1	266	335	1007	AACCGTCATCTCCTCAGTCCCT	CCTGTCACCTTCCATTTGCTTG	0	0	0	1	0	0	0	0	0	0	0	0	0	0	0	0	0	0	0	0	0	0	0	0	0	0	0	0	0	0	0	0	0	0	0
SIRT2.e25.F1 SIRT2.e25.R1	SIRT2	SIRT2.e25.F1	SIRT2.e25.R1	150	197	386	CCCAGGAATTTGAGGCTGCA	TGTCTGCTTCTCCACCAGCG	0	0	0	2	0	0	0	0	0	0	1	0	0	0	0	0	0	0	0	0	0	0	0	0	0	0	0	0	0	0	0	0	0	0	0
FOX.INSR.F1 FOX.INSR.R1	INSR	FOX.INSR.F1	FOX.INSR.R1	194	230	197 233 264 289 290 303 309	ACGTTTGAGGATTACCTGCACA	AGCGACTCCTTGTTCACCACC	1	0	0	1	0	1	3	0	1	1	0	0	0	1	0	0	0	0	0	0	0	0	0	0	0	0	1	0	0	0	0	0	0	0	0
refseq_PKD1L2.F1 refseq_PKD1L2.R1	PKD1L2	refseq_PKD1L2.F1	refseq_PKD1L2.R1	192	394	397	GGCAGTGTCTGTACCTTCAGC	GCAAAGAAAGCAGCGAATCC	1	0	0	0	0	1	0	1	0	0	0	0	0	0	0	0	0	0	0	0	0	0	0	0	0	0	0	0	0	0	0	0	0	0	0
GLRB.e02.F1 GLRB.e02.R1	GLRB	GLRB.e02.F1	GLRB.e02.R1	125	418	370	TTTACATGATGGGGGTCTACGC	TTTTTGCATCTGGTCTCACCAAC	0	0	0	0	1	1	0	1	1	0	0	0	0	0	0	0	0	0	0	0	0	0	0	0	0	0	0	0	0	0	0	0	0	0	0
GABRG2.e01.F3 GABRG2.e01.R3	GABRG2	GABRG2.e01.F3	GABRG2.e01.R3	263	384	361 446 447 726 727 807 825 1681	AACCAAGAGGCAAGAGGCGAG	AGCAGGTTGTTTAAGATGACAGTGA	0	0	0	0	0	0	0	0	0	0	0	0	0	0	0	0	0	0	0	0	0	1	0	0	0	0	0	0	0	0	0	0	0	0	0
KCNT2.e03.F1 KCNT2.e03.R1	KCNT2	KCNT2.e03.F1	KCNT2.e03.R1	146	258	147 255	TGGTGGTTGTGGATAAAGAGAGC	CAGCAAAAGGCAGTCGAAACAT	0	1	0	0	0	0	0	0	0	1	0	0	0	0	0	1	0	0	0	0	0	0	0	0	0	0	0	0	0	0	0	0	0	0	0
refseq_SOX6.F4 refseq_SOX6.R4	SOX6	refseq_SOX6.F4	refseq_SOX6.R4	137	260		AACTACCCCGTACAGTTCATTCC	GTTGATGGCATCTTTGCTCC	0	1	0	0	0	0	0	0	0	0	0	0	0	0	0	0	0	1	0	0	0	0	0	0	0	0	0	0	0	0	0	0	0	0	0
PDK1.e07.F1 PDK1.e07.R1	PDK1	PDK1.e07.F1	PDK1.e07.R1	127	204	331	TGGCTATGAAAATGCTAGGCGT	GGGTAAACACCTCTGTTGGCAT	0	0	0	0	0	0	0	0	0	0	0	0	0	0	0	0	0	0	0	1	0	0	0	0	0	0	0	0	0	0	0	0	0	0	0
MOV10L1.e03.F1 MOV10L1.e03.R1	MOV10L1	MOV10L1.e03.F1	MOV10L1.e03.R1	136	274		GGTTGGATCAGTAGAGGAGTTTCA	CAGTGCAGGAGGTAAATCGCAT	0	1	0	0	0	0	0	0	0	0	0	0	0	0	0	0	0	0	0	0	0	0	0	0	0	0	0	0	0	0	0	0	0	0	0
ANKRD39andANKRD23.e01.F1 ANKRD39andANKRD23.e01.R1	ANKRD39andANKRD23	ANKRD39andANKRD23.e01.F1	ANKRD39andANKRD23.e01.R1	190	366	392 568 870 872	GTGATGCCCAGACCCACG	ACTCCATGTCCAAATCCCAACA	0	0	0	1	1	1	2	1	1	0	0	1	0	0	0	0	0	0	0	0	0	0	0	0	0	0	0	0	0	0	0	0	0	0	0
BTG1.e04.F1 BTG1.e04.R1	BTG1	BTG1.e04.F1	BTG1.e04.R1	125	279		GCTTTTTGCTTTTCATCACCTGC	GGCTCTCTTCCTGTCTTGCGG	0	10	8	5	1	2	1	2	8	2	1	0	0	0	1	0	1	0	0	0	0	0	0	0	0	0	1	0	0	0	0	0	0	1	0
MFN2.e01.F2 MFN2.e01.R2	MFN2	MFN2.e01.F2	MFN2.e01.R2	214	353	96 154 157 220 355 359 361 421 422 423 427 663 666	AGGCGTAAGGAGTAGGCGGG	TTGCATCGAGAGAAGAGCAGGG	0	1	0	1	1	0	1	0	2	0	0	0	0	0	0	0	0	0	0	0	1	0	0	0	0	0	0	0	0	0	0	0	0	0	0
GENX-3414.e04.F1 GENX-3414.e04.R1	FAM47EandSTBD1;GENX-3414;STBD1	GENX-3414.e04.F1	GENX-3414.e04.R1	341	386	103 106 185 335 377 448 449	ACGTCTGTGTCAAACGCAGG	GCTCCATACCTCATCTTCACCC	0	0	0	1	1	0	0	0	0	0	0	0	0	0	0	0	0	0	0	0	0	0	1	0	0	0	0	0	0	0	0	0	0	0	0
ZEB1.e10.F1 ZEB1.e10.R1	ZEB1	ZEB1.e10.F1	ZEB1.e10.R1	205	240		TGGAGACATCTAGACCAGCACT	GCATTCCCTTCTCTTTCACTGC	0	0	1	1	0	0	1	0	0	0	0	0	0	0	0	0	0	1	0	0	0	0	1	0	0	0	0	1	0	0	0	0	0	0	0
LDHC.e05.F1 LDHC.e05.R1	LDHC	LDHC.e05.F1	LDHC.e05.R1	159	283	88 195 301 638	TGTTGCTGGTGTTGCTCTGAAG	ACCATTCCGCCCCAAGACAC	1	1	1	1	1	0	1	1	2	0	0	0	0	2	0	0	0	0	0	0	0	0	0	0	0	0	0	0	0	0	0	0	0	0	0
CAC1C.e07.F1 CAC1C.e07.R1	CAC1C	CAC1C.e07.F1	CAC1C.e07.R1	125	402	128 400 470 471 662	TTTGCCTTCGCCATGCTCACG	ACCTCCAGCCACGTTTTCGG	0	3	0	2	0	0	0	0	0	0	0	0	0	0	0	0	1	0	0	0	0	0	0	0	0	0	0	0	0	0	0	0	0	0	0
MUSK.e02.F2 MUSK.e02.R2	MUSK	MUSK.e02.F2	MUSK.e02.R2	203	227	92 227 319 336 361 492	GGCTGGTAATGGAAGAGAAGACC	GGAAGAAGAGGAGGAGGAAGGC	0	1	0	0	0	0	0	0	0	0	0	0	0	0	0	0	0	0	0	0	0	0	0	0	0	0	0	0	0	0	0	0	0	0	0
PRDM6.e01.F1 PRDM6.e01.R1 exon 4 and 5	PRDM6	PRDM6.e01.F1	PRDM6.e01.R1	142	395	270	GTGCTTCTGCCCCCAGAGAA	GCGAGTTTGCTGCTTTTGTTGA	0	1	0	0	0	3	1	1	0	0	0	0	0	0	0	0	0	0	0	0	0	0	0	0	0	0	0	0	0	0	0	0	0	0	0
GENX-3414.e07.F1 GENX-3414.e07.R1	FAM47EandSTBD1;GENX-3414;STBD1	GENX-3414.e07.F1	GENX-3414.e07.R1	186	264	711 1156	GCCAAAGTGGGTGAAGATGAGG	GCACGTTTACATTCCTTCCCGA	0	0	0	0	0	0	0	0	0	0	0	0	0	0	0	0	0	0	0	0	0	0	0	0	0	0	0	0	0	0	0	0	0	0	0
PCBD2andCATSPER3.e02.F1 PCBD2andCATSPER3.e02.R1	CATSPER3;PCBD2andCATSPER3	PCBD2andCATSPER3.e02.F1	PCBD2andCATSPER3.e02.R1	185	372		AGGAACGATGATGAATGTCGGG	GTGCAGATGGACACAAAGAAGATC	0	2	2	2	0	1	1	2	3	0	0	0	0	1	0	1	0	0	0	0	0	0	0	0	0	0	0	0	0	0	0	0	0	0	0
PCBD2andCATSPER3.e01.F1 PCBD2andCATSPER3.e01.R1	PCBD2andCATSPER3	PCBD2andCATSPER3.e01.F1	PCBD2andCATSPER3.e01.R1	179	209	210	ACTCTCACCTCACATGACTGTG	GCCATATCCTGCTTTCTCCACT	0	0	1	0	1	0	0	0	0	0	0	1	0	1	0	0	0	0	0	0	0	0	0	0	0	0	0	0	0	0	0	0	0	0	0
CLCN6.e04.F1 CLCN6.e04.R1	CLCN6	CLCN6.e04.F1	CLCN6.e04.R1	188	331	85 141 156 169 195 242 270 288 303 400 409 454 470 489 567	GAAAGAAAGCACACCAACGCAG	AGCTCCTTCTCCACCACCACC	0	1	0	0	0	0	0	0	0	0	0	0	0	1	0	0	0	0	0	0	0	0	0	0	0	0	0	0	0	0	0	0	0	0	0
DUSP12.e04.F1 DUSP12.e04.R1	DUSP12	DUSP12.e04.F1	DUSP12.e04.R1	202	235	206 215 222 235 281 288	GGGGTCGAGGATCTATGGCG	AGGGAAGTTGGTCAGTCTTCATG	0	0	1	0	0	0	0	0	0	0	0	0	0	0	0	0	0	0	0	0	0	0	0	0	0	0	0	0	0	0	0	0	0	0	0
ITGA7.e10.F1 ITGA7.e10.R1	ITGA7	ITGA7.e10.F1	ITGA7.e10.R1	161	199	311 369 420 537 601 717 888 1108	AATTCAGAGGCAGGCAGAAGGA	CCCACCATCCAACTCATCCCG	0	0	0	0	0	0	0	1	0	0	0	0	0	0	0	0	0	0	0	0	0	0	0	0	0	0	0	0	0	0	0	0	0	0	1
LMCD1.e02.F1 LMCD1.e02.R1	LMCD1	LMCD1.e02.F1	LMCD1.e02.R1	125	381	111 112 130 377 400 401 429 430 459 470	AGCTGCAGTCAGCAAGAGGTG	CTGTCACTGGCTGCTTCTCCTT	0	1	0	0	1	0	0	0	0	1	0	0	0	0	0	0	0	0	1	0	0	0	0	0	0	0	0	0	0	0	0	0	0	0	0
LM.e06.F1 LM.e03.R1	LM	LM.e06.F1	LM.e03.R1	291	325	149 240 349 398 446 563 611 844	CCAGCCCTTCTCGCCTCAAG	TGGCCCCGCAGATCATGCAG	0	0	0	0	0	0	0	0	1	0	0	0	0	0	0	0	0	0	0	0	0	0	0	0	0	0	0	0	0	0	0	0	0	0	0
ANKRD23.e02.F1 ANKRD23.e02.R1	ANKRD23;ANKRD39andANKRD23	ANKRD23.e02.F1	ANKRD23.e02.R1	135	261	98 533	CTGGCTGACTTGGAAAACTTGG	CTGGCTGTGACCCTTCAGAC	0	1	0	0	0	0	0	0	0	0	0	0	0	0	0	0	0	0	0	0	0	0	0	0	0	0	0	0	0	0	0	0	0	0	0
rs.FKTN.F1 rs.FKTN.R1	FKTN	rs.FKTN.F1	rs.FKTN.R1	173	265	88 155 186 260 280 302	AAGCGGAGCGGCTGCAG	AACTTGTCAGCGTTAAAAGGGC	0	0	0	0	0	0	0	1	0	0	0	0	0	1	0	0	0	0	1	0	0	0	0	0	0	0	1	0	0	0	0	0	0	0	0
LM.e03.F1 LM.e03.R1	LM	LM.e03.F1	LM.e03.R1	347	530	248 249 256 258 269 271 358 526 636 736 745	TCTTCCCCAAACAGCCCCAAG	TGGCCCCGCAGATCATGCAG	0	0	0	0	0	0	0	0	1	0	0	0	0	0	0	0	0	0	0	0	0	0	0	0	0	0	0	0	0	0	0	0	0	0	0
NRG1.u.f.21 NRG1.u.r.25 (exon8)	NRG1	NRG1.u.f.21	NRG1.u.r.25	372	396	372 408 454 572	GTTTACTGGTGATCGCTGCC	TGGGCTGTGGAAGTATAGTGAC	0	0	1	0	0	0	1	0	0	0	0	0	0	0	0	0	0	0	0	0	0	0	0	0	0	0	0	0	0	0	0	0	0	0	0
rs.HIF1A.F1 rs.HIF1A.R1	HIF1A;HIF1AandSPC1	rs.HIF1A.F1	rs.HIF1A.R1	262	389	356	CAGAGAAAGCGAAAAATGGAACATG	TGCTTTAGGTAATGAGCCACCA	1	0	0	1	0	0	0	0	0	0	0	0	0	0	0	0	0	0	0	0	0	0	0	0	0	0	0	0	0	0	0	0	0	0	0
IL6ST.e01.F2 IL6ST.e01.R2	IL6ST	IL6ST.e01.F2	IL6ST.e01.R2	123	550	103 114 186 445 486 595 1235	ATGTTGACGTTGCAGACTTGGC	CAGTGCATGAGGTGGGGGTG	0	1	0	0	0	0	2	1	1	0	0	1	0	0	0	0	0	0	0	0	0	0	0	0	0	0	0	0	0	0	0	0	0	0	0
MEF2B.e06.F1 MEF2B.e06.R1	LOC729991-MEF2B;MEF2B	MEF2B.e06.F1	MEF2B.e06.R1	125	303	128 321 509	ATGCAGCTCAAGGGGAAGAAAG	CTGGGCACTGGCATTCATATGG	2	3	2	0	0	1	0	3	0	0	0	0	0	0	0	1	1	0	0	0	0	0	0	0	0	0	0	0	0	0	0	0	0	0	0
SMAD5.e08.F1 SMAD5.e08.R1	SMAD5	SMAD5.e08.F1	SMAD5.e08.R1	121	200		AGCTGCTAATAAAGTTGCAGCG	GAGCCCAGGAGTTCAATCACGT	0	0	1	0	0	0	0	1	0	0	0	0	0	0	0	0	0	0	0	0	0	0	0	0	0	0	0	0	0	0	0	0	0	0	0
C10orf58.m2h01.F1 C10orf58.m2h01.R1	C10orf58	C10orf58.m2h01.F1	C10orf58.m2h01.R1	133	150	174 206 378 616 725	GGCAGAAGGGAGGCACTTGAG	TCTGGGGCTTGGACAGAAACAC	0	0	0	0	0	1	0	0	0	0	0	0	0	1	0	0	0	0	0	0	0	0	0	0	0	0	0	0	0	0	0	0	0	0	0
NCOA2.m2h03.F1 NCOA2.m2h03.R1	NCOA2	NCOA2.m2h03.F1	NCOA2.m2h03.R1	158	365	420 1661 2072	GACCTCATGCAACTCACAGCT	ACTCTCACAGCCGAACTCTGC	1	0	1	1	1	0	0	0	0	0	0	0	0	1	0	0	0	0	0	0	0	0	0	0	0	0	0	0	0	0	0	0	0	0	0
CAC1B.e01.F1 CAC1B.e03.R2	CAC1B	CAC1B.e01.F1	CAC1B.e03.R2	165	262	162 269 319 407 408 545 548 907 909	TTGAACCTCTTTGTGGCTGTGA	TGTCCTCGTTGGAGATGGGC	0	0	0	0	0	0	0	0	0	0	0	0	0	0	0	0	0	0	0	0	0	0	0	0	0	0	0	0	0	0	0	0	0	0	0
RYR1.e02.F1 RYR1.e02.R1	RYR1	RYR1.e02.F1	RYR1.e02.R1	138	188		CCAGTACTTCACCAACCACTGC	TGTGAAGACAGTTGACCACAGC	0	0	0	1	0	0	0	0	0	0	0	0	0	0	0	0	0	0	0	0	0	0	0	0	0	0	0	0	0	0	0	0	0	0	0
POU6F1.e01.F1 POU6F1.e01.R1	POU6F1	POU6F1.e01.F1	POU6F1.e01.R1	153	249	90 138	ATGAATCTCTAATCGGTGGCCG	TCCAGTCCTTTGCTCTCTTCCT	0	2	1	1	1	1	1	2	3	0	0	0	0	0	0	0	0	0	0	0	0	0	0	0	1	0	0	0	0	0	0	0	0	0	0
HDAC9.e01.F1 HDAC9.e01.R1	HDAC9	HDAC9.e01.F1	HDAC9.e01.R1	136	400	138 408 490 800 811	GTCTGCACCTTTGCCTCAGA	ACGTGTGTGCGTGGGTTC	1	0	1	1	0	1	1	0	1	0	0	0	0	1	0	0	0	0	0	0	0	0	0	0	0	0	0	0	0	0	0	0	0	0	0
TRPM4.e03.F1 TRPM4.e03.R1	TRPM4	TRPM4.e03.F1	TRPM4.e03.R1	128	484	303	GCTGGATCCCCAAGATCTTCAA	ACAGCCACACCAACATGCC	1	1	0	1	1	0	1	3	1	0	0	0	0	0	0	0	0	0	0	0	0	0	0	0	0	0	0	0	0	0	0	0	0	0	0
MYO6.e03.F1 MYO6.e03.R1	MYO6	MYO6.e03.F1	MYO6.e03.R1	128	167	130 169	TGGAACAAGACCCAAAATGACAC	CACAAGAAGTATTGATGGTATCACGTAG	0	0	0	0	0	0	0	1	0	0	0	0	0	1	0	0	0	0	0	0	0	0	0	0	0	0	0	0	0	0	0	0	0	0	0
MOV10L1.e10.F1 MOV10L1.e10.R1	MOV10L1	MOV10L1.e10.F1	MOV10L1.e10.R1	168	268	93 106 260 356 362 627	GACATCTGGAAAGCCTCACGC	CCAAAAAGGACACGTTCAGCCC	0	1	0	0	0	0	0	0	0	0	0	0	0	0	0	0	0	0	0	0	0	0	0	0	0	0	0	0	0	0	0	0	0	0	0
refseq_LRRC23.F1 refseq_LRRC23.R1	LRRC23;LRRC23andENO2;RPL13P5andLRRC23andENO2	refseq_LRRC23.F1	refseq_LRRC23.R1	100	398		TGCATCTTCGAGACAACCAG	AAGGCCAGCGTCTTTGATCT	0	0	0	1	0	0	0	0	0	1	0	0	0	0	0	0	0	0	0	0	0	0	0	0	0	0	0	0	0	0	0	0	0	0	0
OGDH.e10.F1 OGDH.e10.R1	OGDH	OGDH.e10.F1	OGDH.e10.R1	158	261	86 203	TGCAAAACTTGATCCTCTCGGA	GTGCTGATTCCTGTCCCCCG	2	0	0	0	1	0	2	0	2	1	0	0	0	0	0	0	0	0	0	0	0	0	0	0	0	0	0	0	0	0	0	0	1	0	0
CREM.e19.F1 CREM.e15.R1	CREM	CREM.e19.F1	CREM.e15.R1	198	241	85 175 258 301 337 456 540 980	CTAGCTCACCACTGCCTCTGC	TGTGACTTGGGGCAAGTTCAGT	0	1	0	0	1	0	1	0	0	0	0	0	0	0	0	0	0	0	1	0	0	0	0	0	0	0	0	0	0	0	0	0	0	0	0
NDUFC2andKCTD14.e01.F1 NDUFC2andKCTD14.e01.R1	NDUFC2-KCTD14;NDUFC2andKCTD14	NDUFC2andKCTD14.e01.F1	NDUFC2andKCTD14.e01.R1	125	269	194 220 273 364 397 528 1267	ACATCGGCTTCTTGGGCTACTG	AGGGTGGTGGTGTGGAACTCA	2	5	6	7	3	1	6	7	8	2	0	2	0	3	0	0	3	0	0	0	0	0	0	0	0	0	0	0	0	0	0	0	0	0	0
